# Supplementary material for: Accumulation of senescent cells in the adrenal gland induces hypersecretion of corticosterone via IL1β secretion
Source: PubMed Central journal article supplement (PMC11488315; doi:10.1111/acel.14206), 2024-05-20
Supplement: ACEL-23-e14206-s001.pdf [file ACEL-23-e14206-s001.pdf]

**Supplementary Table 1.** List of Quantitative Results of Immunostaining.

|                  |           |           |             |
|------------------|-----------|-----------|-------------|
| Figure 1 G-I     | SF1-HP    | StAR      | SF1-HP/StAR |
| YM ZT0           | 7.4±1.1   | 4.5±1.9   | 3.1±0.9     |
| YM ZT12          | 7.5±1.5   | 13.22±2.1 | 5.6±0.5     |
| OM ZT0           | 59.3±4.0  | 76.6±3.5  | 47.5±2.3    |
| OM ZT12          | 61.7±1.8  | 77.6±3.2  | 49.9±2.7    |
| Figure 2 E       | p16       | γH2AX     |             |
| 6M               | 5.0±2.6   | 9.0±1.8   |             |
| 18M              | 55.0±3.2  | 42.3±5.4  |             |
| 24M              | 84.1±5.1  | 75.5±4.9  |             |
| Figure 2G        | 53BP1     | βgal      |             |
| YM               | 5.0±2.5   | 1.8±0.76  |             |
| OM               | 67.7±5.2  | 52.0±3.3  |             |
| Figure 2 I       | p16       | SF1-HP    |             |
| YM ZT0           | 4.0±1.3   | 6.3±2.5   |             |
| YM ZT12          | 5.7±1.8   | 13.6±2.4  |             |
| OM ZT0           | 83.4±2.1  | 56.0±3.7  |             |
| OM ZT12          | 82.7±2.2  | 58.4±3.0  |             |
| Figure 3 G, H, J | p16       | SF1-HP    | StAR        |
| Control (OM)     | 82.1±4.5  | 57.1±3.7  | 71.3±5.3    |
| DQ (OM)          | 19.9±9.0  | 20.1±4.9  | 2.5±2.4     |
| Figure 4 C       | SF1-HP    |           |             |
| OM IL1β (+)      | 70.9±12.0 |           |             |
| OM IL1β (-)      | 72.4±15.4 |           |             |

|            |                 |
|------------|-----------------|
| Figure 4 C | IL1 $\beta$     |
| YM         | 4.6 $\pm$ 2.8   |
| OM         | 50.0 $\pm$ 21.9 |

|              |                 |
|--------------|-----------------|
| Figure 4 E   | IL1 $\beta$     |
| Control (OM) | 47.7 $\pm$ 21.1 |
| DQ (OM)      | 9.2 $\pm$ 2.8   |

|              |               |
|--------------|---------------|
| Figure 4 I   | Iba1          |
| YM           | 3.8 $\pm$ 1.3 |
| Control (OM) | 4.4 $\pm$ 1.5 |
| DQ (OM)      | 6.0 $\pm$ 1.6 |

|                          |                |                |                |
|--------------------------|----------------|----------------|----------------|
| Figure 5 E, F, G         | p16            | SF1-HP         | StAR           |
| YM                       | 1.6 $\pm$ 1.6  | 3.8 $\pm$ 1.0  | 11.6 $\pm$ 2.2 |
| $\alpha$ -IL1 $\beta$ OM | 30.7 $\pm$ 2.0 | 9.4 $\pm$ 1.7  | 30.7 $\pm$ 2.0 |
| $\alpha$ -IgG OM         | 63.1 $\pm$ 5.2 | 48.2 $\pm$ 4.6 | 72.0 $\pm$ 3.8 |
| 28M                      | 75.1 $\pm$ 4.2 | 66.1 $\pm$ 2.6 | 71.5 $\pm$ 5.7 |

|                          |               |                 |                |
|--------------------------|---------------|-----------------|----------------|
| Figure 5 I, K, L         | Iba1          | IL1 $\beta$     | SF1-HP         |
| $\alpha$ -IL1 $\beta$ OM | 5.2 $\pm$ 1.6 | 20.7 $\pm$ 6.0  | 10.4 $\pm$ 5.7 |
| $\alpha$ -IgG OM         | 5.0 $\pm$ 2.0 | 48.7 $\pm$ 19.0 | 62.7 $\pm$ 2.5 |

|                                          |                |
|------------------------------------------|----------------|
| Figure 5 M                               | SF1-HP         |
| $\alpha$ -IL1 $\beta$ OM IL1 $\beta$ (-) | 5.3 $\pm$ 1.5  |
| $\alpha$ -IgG OM IL1 $\beta$ (-)         | 58.0 $\pm$ 1.0 |
| $\alpha$ -IL1 $\beta$ OM IL1 $\beta$ (+) | 17.0 $\pm$ 7.6 |
| $\alpha$ -IgG OM IL1 $\beta$ (+)         | 65.7 $\pm$ 2.3 |

| Figure 6 C, D, F | p16      | $\gamma$ H2AX | Iba1    |
|------------------|----------|---------------|---------|
| Control          | 10.7±1.7 | 0.0±0.0       | 3.2±1.3 |
| Control Dex      | 50.6±2.6 | 72.1±5.0      | 3.8±1.8 |
| DQ Dex           | 6.7±1.8  | 29.0±4.1      | 4.0±1.6 |
| OM               | 75.9±5.5 | 81.6±2.0      | 3.8±1.9 |

| Figure S4 D, E | p16      | SF1-HP   |
|----------------|----------|----------|
| 6M             | 2.2±1.5  | 8.6±1.9  |
| 18M            | 66.6±7.2 | 29.3±4.7 |
| 24M            | 89.8±3.9 | 56.7±2.2 |

| Figure S5 A  | p16      | $\gamma$ H2AX | $\beta$ gal |
|--------------|----------|---------------|-------------|
| Control (OM) | 46.6±4.3 | 72.8±9.6      | 39.2±9.2    |
| DQ (OM)      | 8.0±2.4  | 8.6±1.6       | 1.6±2.0     |

| Figure S5 B  | p16      | $\gamma$ H2AX | 53BP1    | $\beta$ gal |
|--------------|----------|---------------|----------|-------------|
| Control (OM) | 83.2±3.3 | 65.4±18.3     | 67.5±2.7 | 68.9±15.0   |
| DQ (OM)      | 26.4±5.5 | 28.9±4.9      | 22.1±1.9 | 23.3±4.9    |

| Figure S6 C              | $\gamma$ H2AX |
|--------------------------|---------------|
| YM                       | 2.1±1.3       |
| $\alpha$ -IL1 $\beta$ OM | 74.6±1.6      |
| $\alpha$ -IgG OM         | 76.6±1.6      |
| 28M                      | 86.2±3.9      |

| Figure S7 B, D | p16      | SF1-HP   | $\gamma$ H2AX | Iba1     |
|----------------|----------|----------|---------------|----------|
| 28M Male       | 80.4±3.0 | 61.1±2.9 | 80.4±1.8      | 4.2±1.6  |
| 28M Female     | 54.8±3.8 | 17.6±1.8 | 39.5±2.6      | 10.2±1.5 |

| Figure S8 A, B, D | p16      | SF1-HP   | $\gamma$ H2AX | Iba1     |
|-------------------|----------|----------|---------------|----------|
| YM                | 4.1±1.0  | 62.2±3.3 | 0.6±1.0       | 2.2±1.5  |
| OM                | 59.8±4.9 | 9.8±2.9  | 48.0±5.3      | 12.0±2.3 |

| Figure S9 C, E | p16            | $\gamma$ H2AX  | SF1-HP         | Iba1           | IL1 $\beta$    |
|----------------|----------------|----------------|----------------|----------------|----------------|
| YM             | 5.3 $\pm$ 2.3  | 1.4 $\pm$ 1.4  | 60.2 $\pm$ 4.8 | 2.2 $\pm$ 1.5  | 4.7 $\pm$ 2.5  |
| Control (OM)   | 54.8 $\pm$ 3.2 | 50.5 $\pm$ 4.4 | 17.9 $\pm$ 2.6 | 10.2 $\pm$ 1.8 | 17.0 $\pm$ 3.6 |
| DQ (OM)        | 20.2 $\pm$ 6.6 | 11.7 $\pm$ 2.0 | 6.6 $\pm$ 1.4  | 5.6 $\pm$ 2.3  | 6.7 $\pm$ 2.1  |

| Figure S10 B | TUNEL          |
|--------------|----------------|
| YM           | 0.0 $\pm$ 0.0  |
| Control (OM) | 0.0 $\pm$ 0.0  |
| DQ (OM)      | 0.4 $\pm$ 0.5  |
| E14.5        | 16.0 $\pm$ 2.0 |

| Figure S10 C | Ki67           |
|--------------|----------------|
| 4M (YM)      | 19.2 $\pm$ 3.9 |
| 8M (YM)      | 0.6 $\pm$ 0.9  |
| Control (OM) | 0.6 $\pm$ 0.9  |
| DQ (OM)      | 0.8 $\pm$ 0.8  |

**Supplementary Table 2** The primer sequences used in this study are listed.

| primer name        | Sequence (5' to 3')      |
|--------------------|--------------------------|
| mop16-Fw           | CCAGGGCCGTGTGCAT         |
| mop16-Rv           | TACGTGAACGTTGCCCATCA     |
| moSF1-Fw           | AGTTGCTATTGTGCCTGGTG     |
| moSF1-Rv           | TCGTTGCCCAAATGCTTGTG     |
| moStAR-Fw          | TTGGGCATACTCAACAACCA     |
| moStAR-Rv          | TGATGACCGTGTCTTTTCCA     |
| moCYP11A1-Fw       | GCTGGAAGGTGTAGCTCAGG     |
| moCYP11A1-Rv       | CACTGGTGTGGAACATCTGG     |
| moCYP11B1-Fw       | CAGGAGCCTGACCCGATGGACA   |
| moCYP11B1-Rv       | GACTGTGGACGACCCTCTGCCA   |
| moPer2-Fw          | ACGACAATGGGAAGGAGCTG     |
| moPer2-Rv          | TGTGCTCTGCCTCTGTTCATC    |
| moBmal-Fw          | CAAGCACCTTCCTTCCAATG     |
| moBmal-Rv          | GATTGCAGTCCACACCACTG     |
| moclock-Fw         | CTCCACATGCCTCCCACTTT     |
| moclock-Rv         | ATCCCCAGGCATGAGAGTCT     |
| moCry1-Fw          | GGTTGCCTGTTTCTGACTCGT    |
| moCry1-Rv          | GACAGCCACATCCAACCTCCAG   |
| moTBP-Fw           | TCAAACCCAGAATTGTTCTCC    |
| moTBP-Rv           | GGGGTAGATGTTTTCAAATGC    |
| moMRC1-Fw          | CACACTCATCCATTACAACCAAA  |
| moMRC1-Rv          | GAGGACCACGGTGACCACT      |
| moCD68-Fw          | TCTCTAAGGCTACAGGCTGCT    |
| moCD68-Rv          | CAATGATGAGAGGCAGCAAG     |
| moTREM2-Fw         | GACTGTGGCCAAGATGCTG      |
| moTREM2-Rv         | CCTGGCTGGACTTAAGCTGT     |
| moCSF1-Fw          | AAGTGGAGGAGCCATCGAG      |
| moCSF1-Rv          | ACTGGCAGTTCACCTGTCT      |
| moF4/80-Fw         | CGTGTGTTGGTGGCACTGTGA    |
| moF4/80-Rv         | CCACATCAGTGTTCAGGAGAC    |
| moIL1b-Fw          | TGGACCTTCCAGGATGAGGACA   |
| moIL1b-Rv          | GTTTCATCTCGGAGCCTGTAGTG  |
| moCCL2-Fw          | GCTACAAGAGGATCACCAGCAG   |
| moCCL2-Rv          | GTCTGGACCCATTCCTTCTTGG   |
| moCD11b-Fw         | TACTTCGGGCAGTCTCTGAGTG   |
| moCD11b-Rv         | ATGGTTGCCTCCAGTCTCAGCA   |
| moCX3CL1-Fw        | TGCTCATCCGCTATCAGCTA     |
| moCX3CL1-Rv        | ATTTCTCCTTCGGGTCAGC      |
| moCXCL1-Fw         | TCCAGAGCTTGAAGGTGTTGCC   |
| moCXCL1-Rv         | AACCAAGGGAGCTTCAGGGTCA   |
| moIL6-Fw           | TACCACTTCACAAGTCGGAGGC   |
| moIL6-Rv           | CTGCAAGTGCATCATCGTTGTTC  |
| moCCL5-Fw          | CCTGCTGCTTTGCCTACCTCTC   |
| moCCL5-Rv          | ACACACTTGGCGGTTCCCTTCGA  |
| moMMP3-Fw          | CTCTGGAACCTGAGACATCACC   |
| moMMP3-Rv          | AGGAGTCCTGAGAGATTTGCGC   |
| moTNF $\alpha$ -Fw | GGTGCCTATGTCTCAGCCTCTT   |
| moTNF $\alpha$ -Rv | GCCATAGAAGTGTGAGAGGGAG   |
| moCasapase9-Fw     | AGAGGTTCTCAGACCAGAAACA   |
| moCasapase9-Rv     | CATATCTGCATGTCCCCTGA     |
| moMicroglobulin-Fw | CCACTGAAAAAGATGAGTATGCCT |
| moMicroglobulin-Rv | CCAATCCAAATGCGGCATCTCA   |

**Supplementary Table 3** The manufacturers and conditions of use of the antibodies used in this study are summarized below.

| Antibody name                                                  | Supplier<br>(Catalog No.)                   | Clonality<br>(Clone)         | Reactivity                   | Application                          |
|----------------------------------------------------------------|---------------------------------------------|------------------------------|------------------------------|--------------------------------------|
| Anti-CDKN2A/p16INK4a<br>Antibody                               | abcam<br>(ab211542)                         | Rabbit<br>mono<br>(EPR20418) | Mouse                        | IF (1:200)                           |
| Anti-mouse Nr5a1<br>(Ad4BP/SF1)<br>monoclonal Antibody rat mAb | Transgenic<br>(KO610)                       | mouse<br>mono<br>(1B1F10)    | Mouse                        | IF (1:500)<br>IHC (1:200)            |
| StAR Rabbit Polyclonal<br>antibody                             | Proteintech<br>(12225-1-AP)                 | Rabbit poly                  | Human<br>Mouse<br>Rat<br>Pig | IF (1:100)                           |
| Phospho-Histone<br>H2A.X(Ser139)<br>(20E3) Rabbit mAb          | Cell Signaling<br>Technology<br>(#9718)     | Rabbit<br>mono<br>(20E3)     | Human<br>Mouse<br>Others     | IF (1:500)                           |
| 53BP1 antibody                                                 | Novusbio<br>(NB100-304)                     | Rabbit poly                  | Human<br>Mouse<br>Others     | IF (1:250)                           |
| ki67 antibody                                                  | Novusbio<br>(NB110-89719)                   | Rabbit poly                  | Human<br>Mouse<br>Rat        | IHC (1:100)                          |
| Iba1 antibody                                                  | GeneTex<br>(GTX100042)                      | Rabbit poly                  | Human<br>Mouse<br>Rat        | IHC (1:50)                           |
| IL1 $\beta$ antibody                                           | Bioss<br>(bs-0812R)                         | Rabbit poly                  | Human<br>Mouse<br>Others     | IHC (1:100)                          |
| Cy3-conjugated Donkey<br>Anti-Rat IgG (H+L)                    | Jackson Immuno<br>Research<br>(712-165-153) | -                            | -                            | IF secondary<br>antibody<br>(1:1000) |
| Alexa Fluor 647 Goat<br>anti-rabbit IgG (H+L)                  | Thermo Fisher<br>Scientific<br>(A-21245)    | -                            | -                            | IF secondary<br>antibody<br>(1:1000) |
