# Supplementary material for: Accumulation of senescent cells in the adrenal gland induces hypersecretion of corticosterone via IL1β secretion
Source: PubMed Central journal article supplement (PMC11488315; doi:10.1111/acel.14206), 2024-05-20
Supplement: ACEL-23-e14206-s002.pdf [file ACEL-23-e14206-s002.pdf]

## Supplementary Figure 1

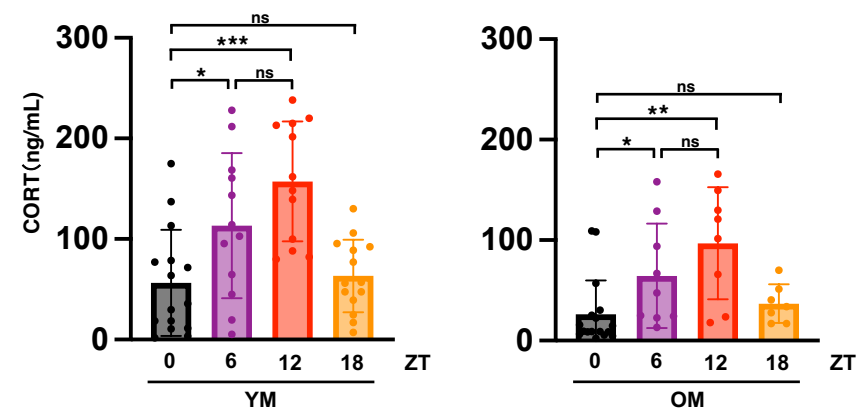

**Figure S1.** CORT levels in mouse plasma samples obtained every 6 h (ZT0, 6, 12, 18; 08:00, 14:00, 20:00, 2:00, lights on: ZT0, lights off: ZT12) in 6-month-old female mice (YM) and  $\geq 20$ -month-old female mice (OM) in diurnal rhythm. Data are shown as the mean  $\pm$  SD. Asterisks indicate statistical significance ( $*P < 0.05$ ,  $**P < 0.001$ ,  $***P < 0.0001$ , ns; not significant).

# Supplementary Figure 2

**A**

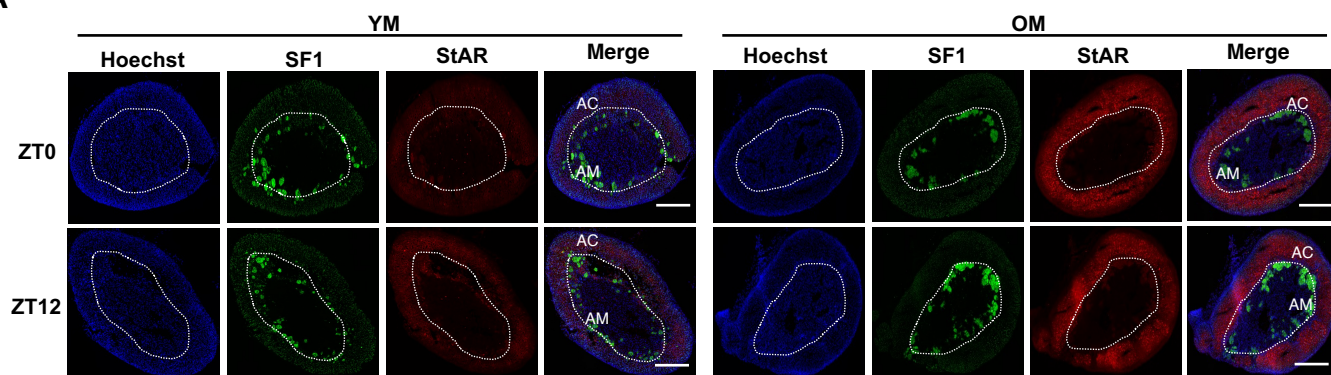

**B**

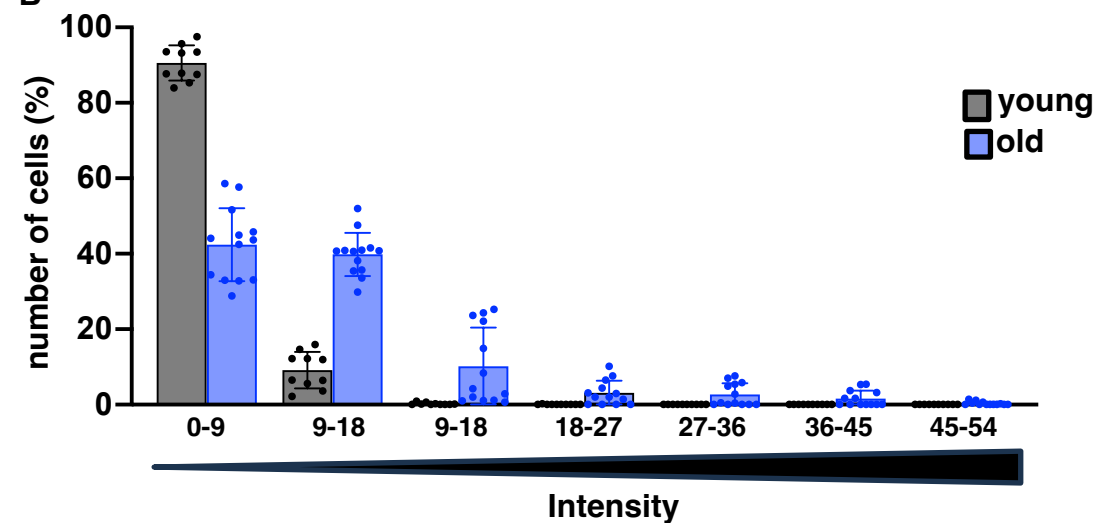

**Figure S2. A.** Immunofluorescence analysis of SF1 and StAR in the adrenal gland in YM and OM at ZT0 and ZT12, respectively, using fluorescence microscopy. Scale bar = 500  $\mu$ m. AC: adrenal cortex, AM: adrenal medulla. **B.** Histogram showing fluorescence intensity criteria for SF1-positive cells. The criterion for SF1-high positive cells (SF1-HP) was determined as cells with intensity greater than “9.” Fluorescence intensity of SF1 was corrected for Hoechst.

### Supplementary Figure 3

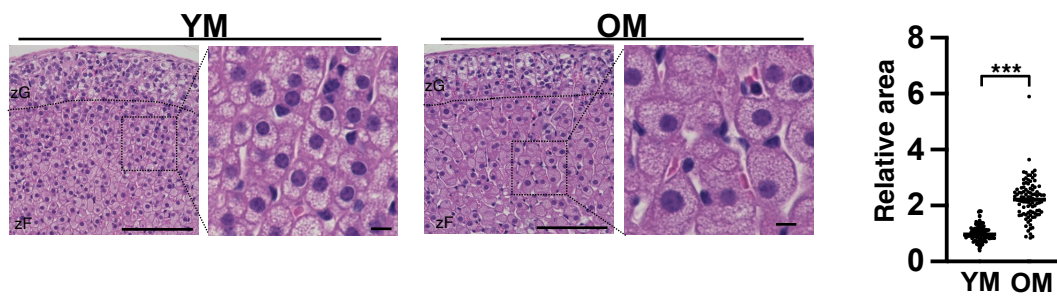

**Figure S3.** Tissue sections prepared from YM and OM (female) adrenal glands were stained with hematoxylin–eosin (H&E) for histological evaluation and assessed with light microscopy. Scale bar (solid line) = 50  $\mu\text{m}$ . zG: zona glomerulosa, zF: zona fasciculata. The size of cells in H&E-stained adrenal glands was quantified in YM and OM.

# Supplementary Figure 4

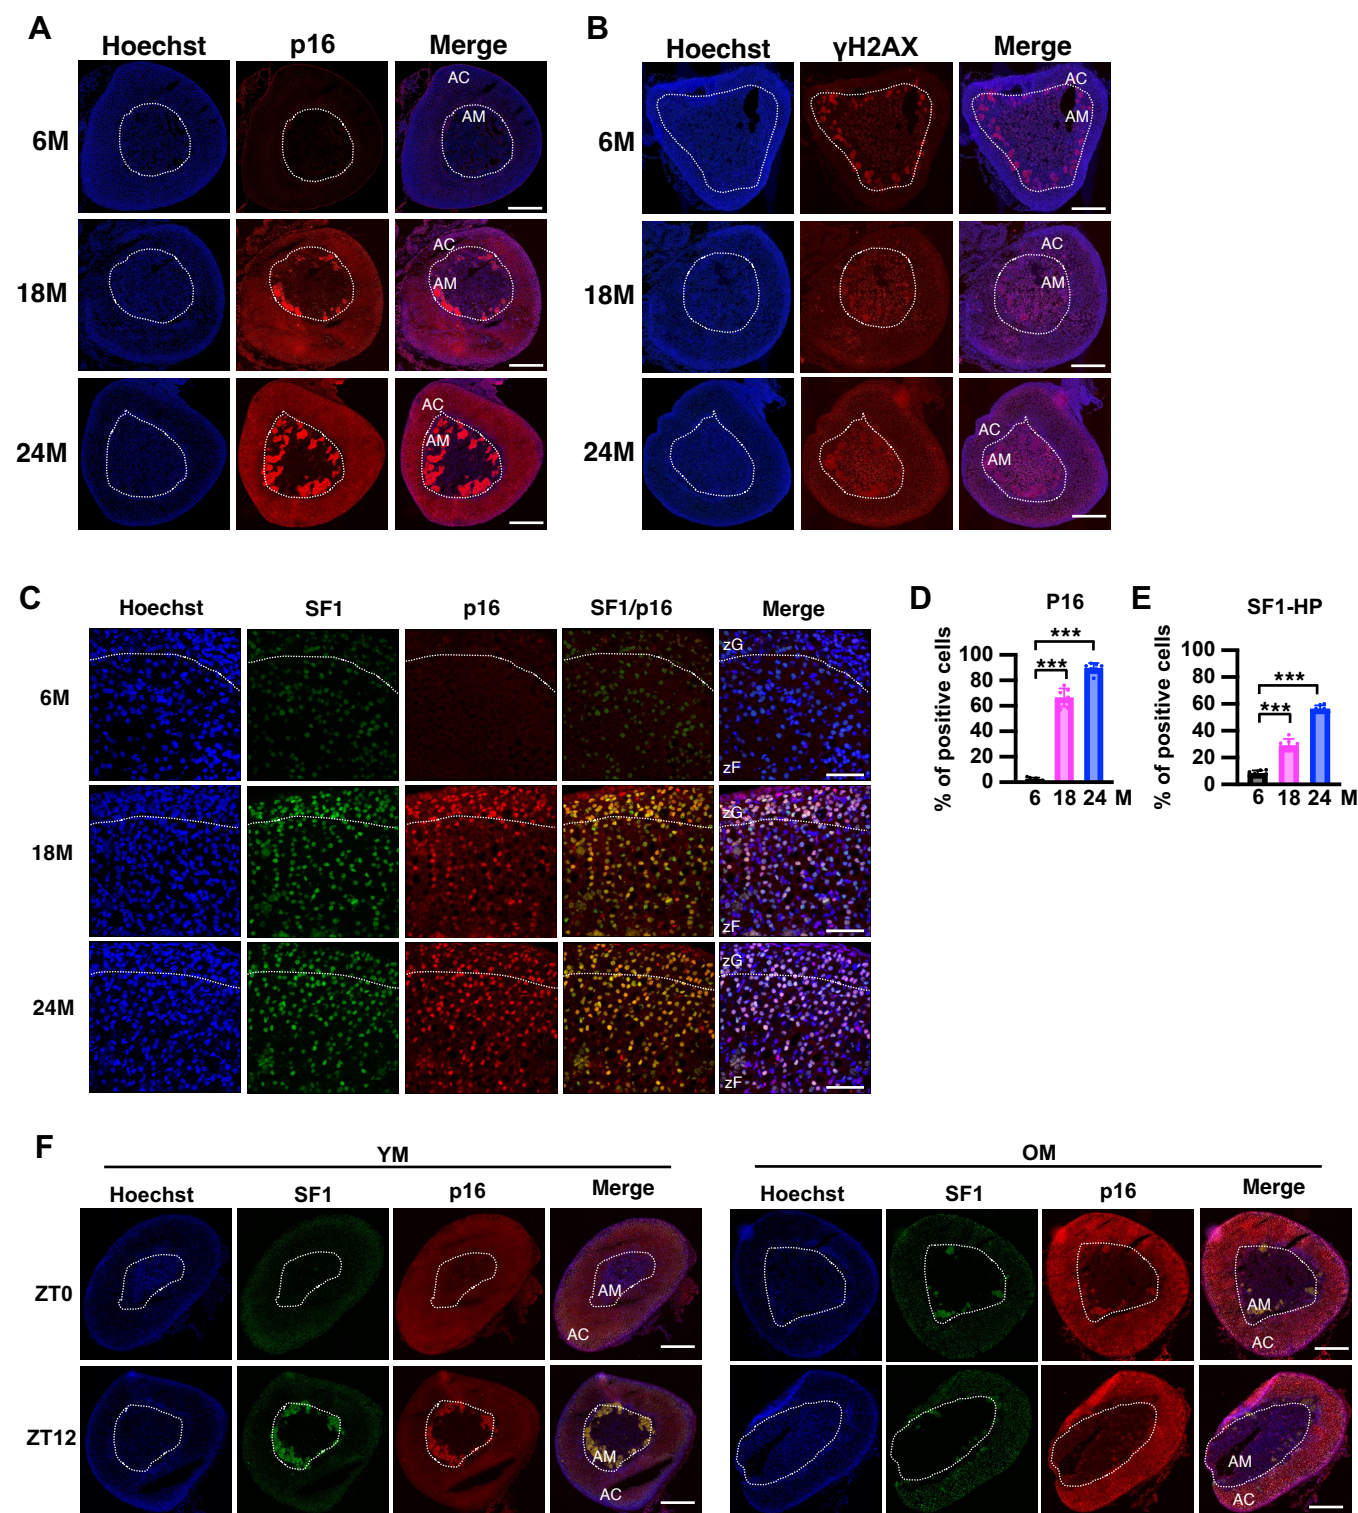

**Figure S4. A and B.** Immunofluorescent analysis of p16 and  $\gamma$ H2AX in the whole adrenal gland at 6, 18, and 24 months. Each section was stained with an anti-p16 and  $\gamma$ H2AX antibody and observed using a fluorescence microscopy. Scale bar = 500  $\mu$ m. AC: adrenal cortex, AM: adrenal medulla. **C.** Immunofluorescent analysis of p16 and SF1 in the adrenal gland at 6, 18, and 24M. Each section was stained with an anti-p16 and SF1 antibody and observed using a confocal laser scanning microscope. Scale bar = 50  $\mu$ m. zG: zona glomerulosa, zF: zona fasciculata. **D and E.** The percentage of p16- and SF1-positive cells (SF1-HP) in zF was quantified at 6, 18, and 24M. Cell counts were calculated from photographs, including those in Figure S4 D. **F.** Immunofluorescence analysis of p16 and SF1 using a fluorescence microscopy in the adrenal gland of YM and OM at ZT0 and ZT12. Scale bar = 500  $\mu$ m. Data are shown as the mean  $\pm$  SD. Asterisks indicate statistical significance (\*\*\*)  $P < 0.0001$ ). The quantitative results of immunostaining are summarized in Table S1.

## Supplementary Figure 5

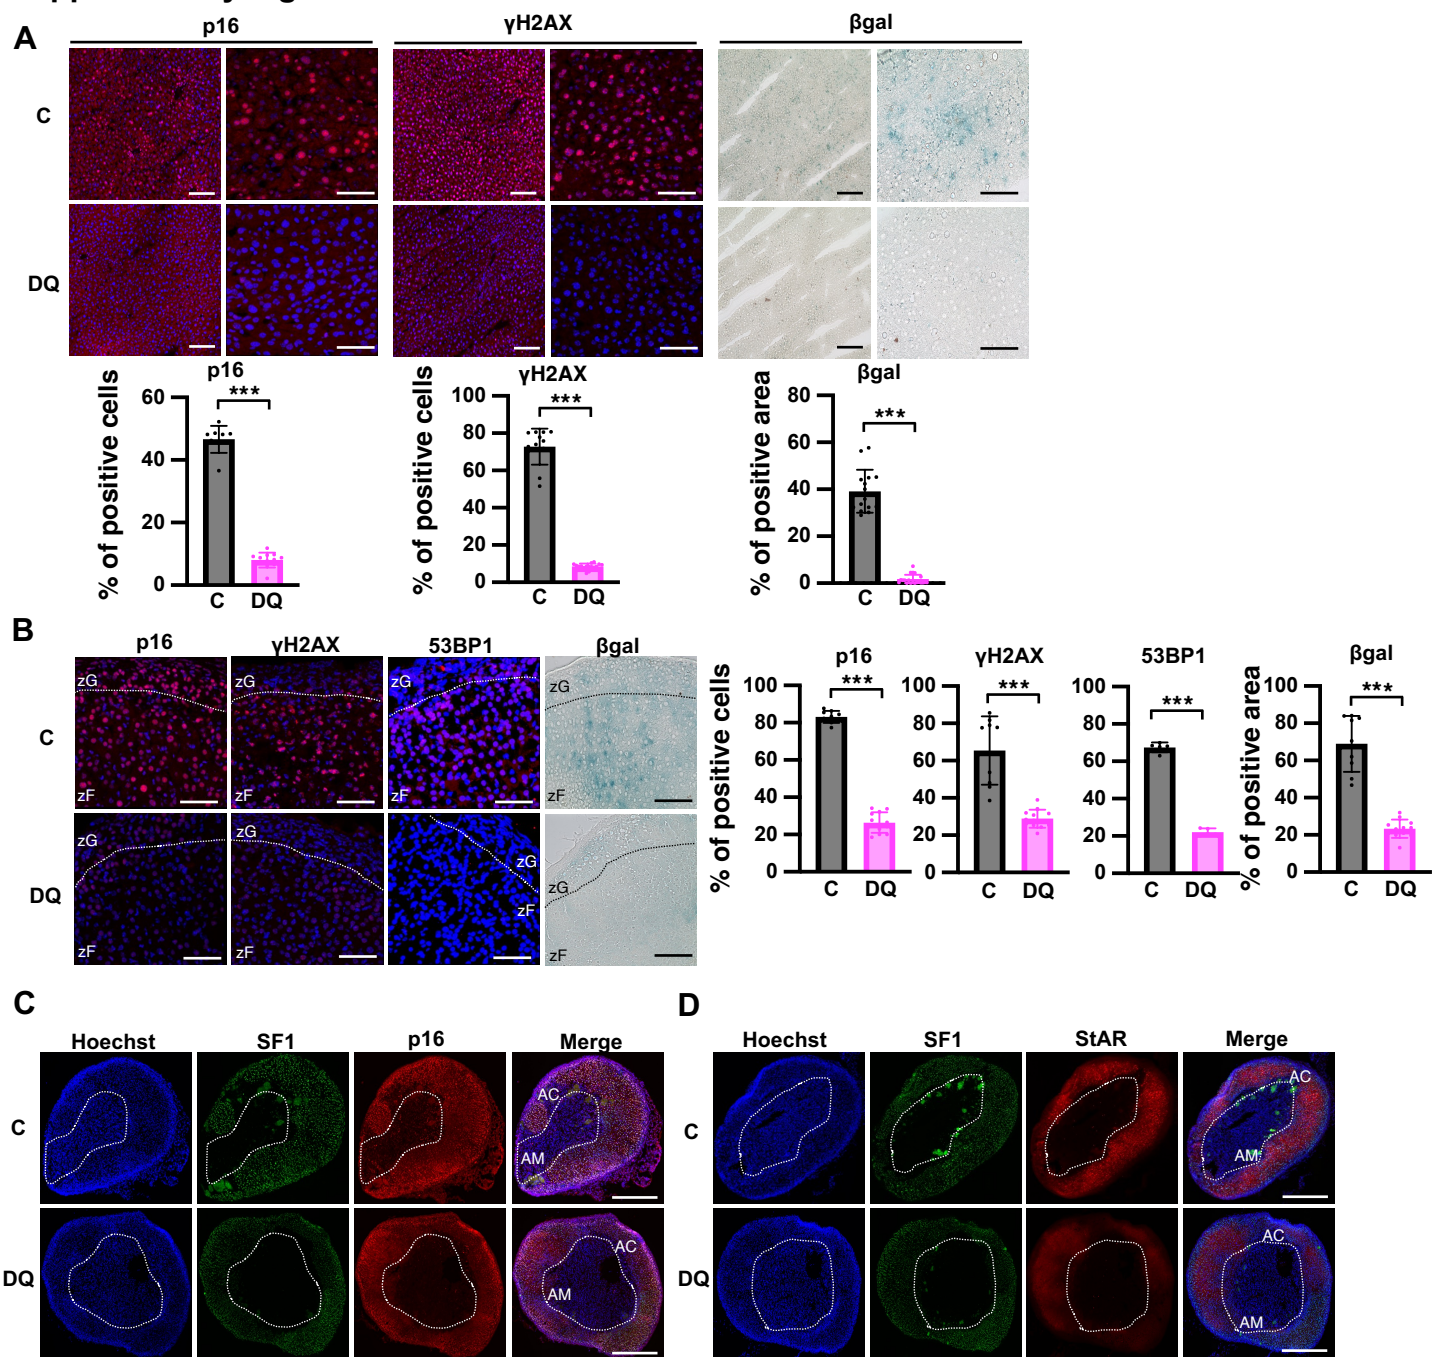

**Figure S5.** A. The expression of senescence markers in the liver was reduced by treatment with senolytic drugs. Each section was stained with anti-p16 or  $\gamma$ -H2AX antibodies.  $\beta$ -galactosidase activity was tested using X-gal as substrate and observed using confocal laser scanning microscopy and light microscopy. Scale bar (solid line) = 50  $\mu$ m. **B.** Immunofluorescence analysis of p16,  $\gamma$ H2AX, and 53BP1, and as well as  $\beta$ -galactosidase activity, in the adrenal gland in dasatinib + quercetin (DQ)-treated mice. Figure 3F shows the results of immunostaining in different mice. Scale bar (solid line) = 50  $\mu$ m, zG: zona glomerulosa, zF: zona fasciculata. **C and D.** Immunofluorescence analysis of p16, SF1, and StAR in the adrenal gland of DQ-treated mice. Each section was stained with anti-p16, -SF1, and -StAR antibodies and observed using a fluorescence microscopy. Scale bar = 500  $\mu$ m. AC: adrenal cortex, AM: adrenal medulla. (C: control, DQ: senolysis). Data are shown as the mean  $\pm$  SD. Asterisks indicate statistical significance (\*\*\* $P < 0.0001$ ). The quantitative results of immunostaining are summarized in Table S1.

# Supplementary Figure 6

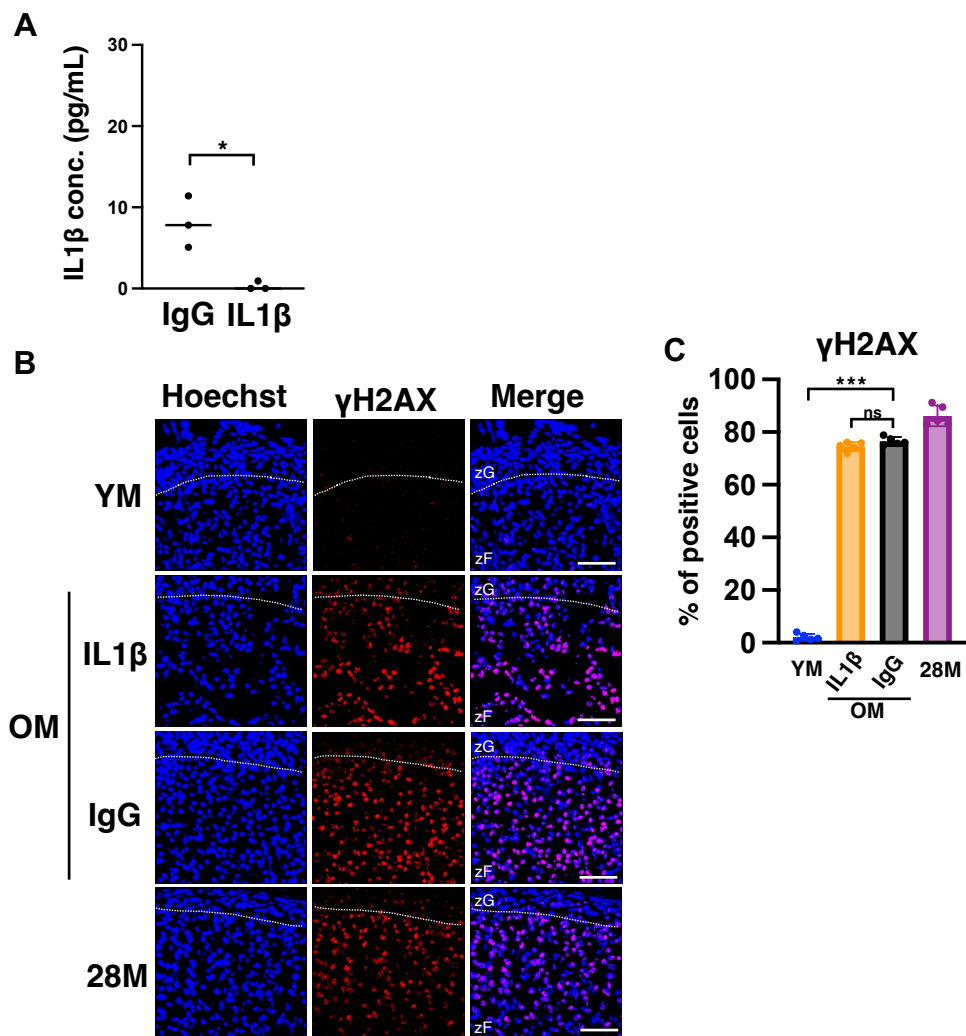

**Figure S6.** **A.** Measurements of IL1 $\beta$  levels in mouse plasma in treated with IgG and IL1 $\beta$ -antibody mice (IgG: control IgG, IL1 $\beta$ : IL1 $\beta$ -antibody). **B.** Immunofluorescence analysis of  $\gamma$ H2AX in the adrenal gland of IL1 $\beta$ -antibody-treated mice. Each section was stained with anti- $\gamma$ H2AX antibodies and observed using confocal laser scanning microscopy. Scale bar = 50  $\mu$ m. zG: zona glomerulosa, zF: zona fasciculata. (YM: young mice, IL1 $\beta$  and IgG: antibody administered mice, 28M: 28-month-old mice). **C.** Percentage of  $\gamma$ H2AX-positive cells. Data are shown as mean  $\pm$  SD. Asterisks indicate statistical significance (\* $P$  < 0.05, \*\*\* $P$  < 0.0001, ns; not significant). The quantitative results of immunostaining are summarized in Table S1.

# Supplementary Figure 7

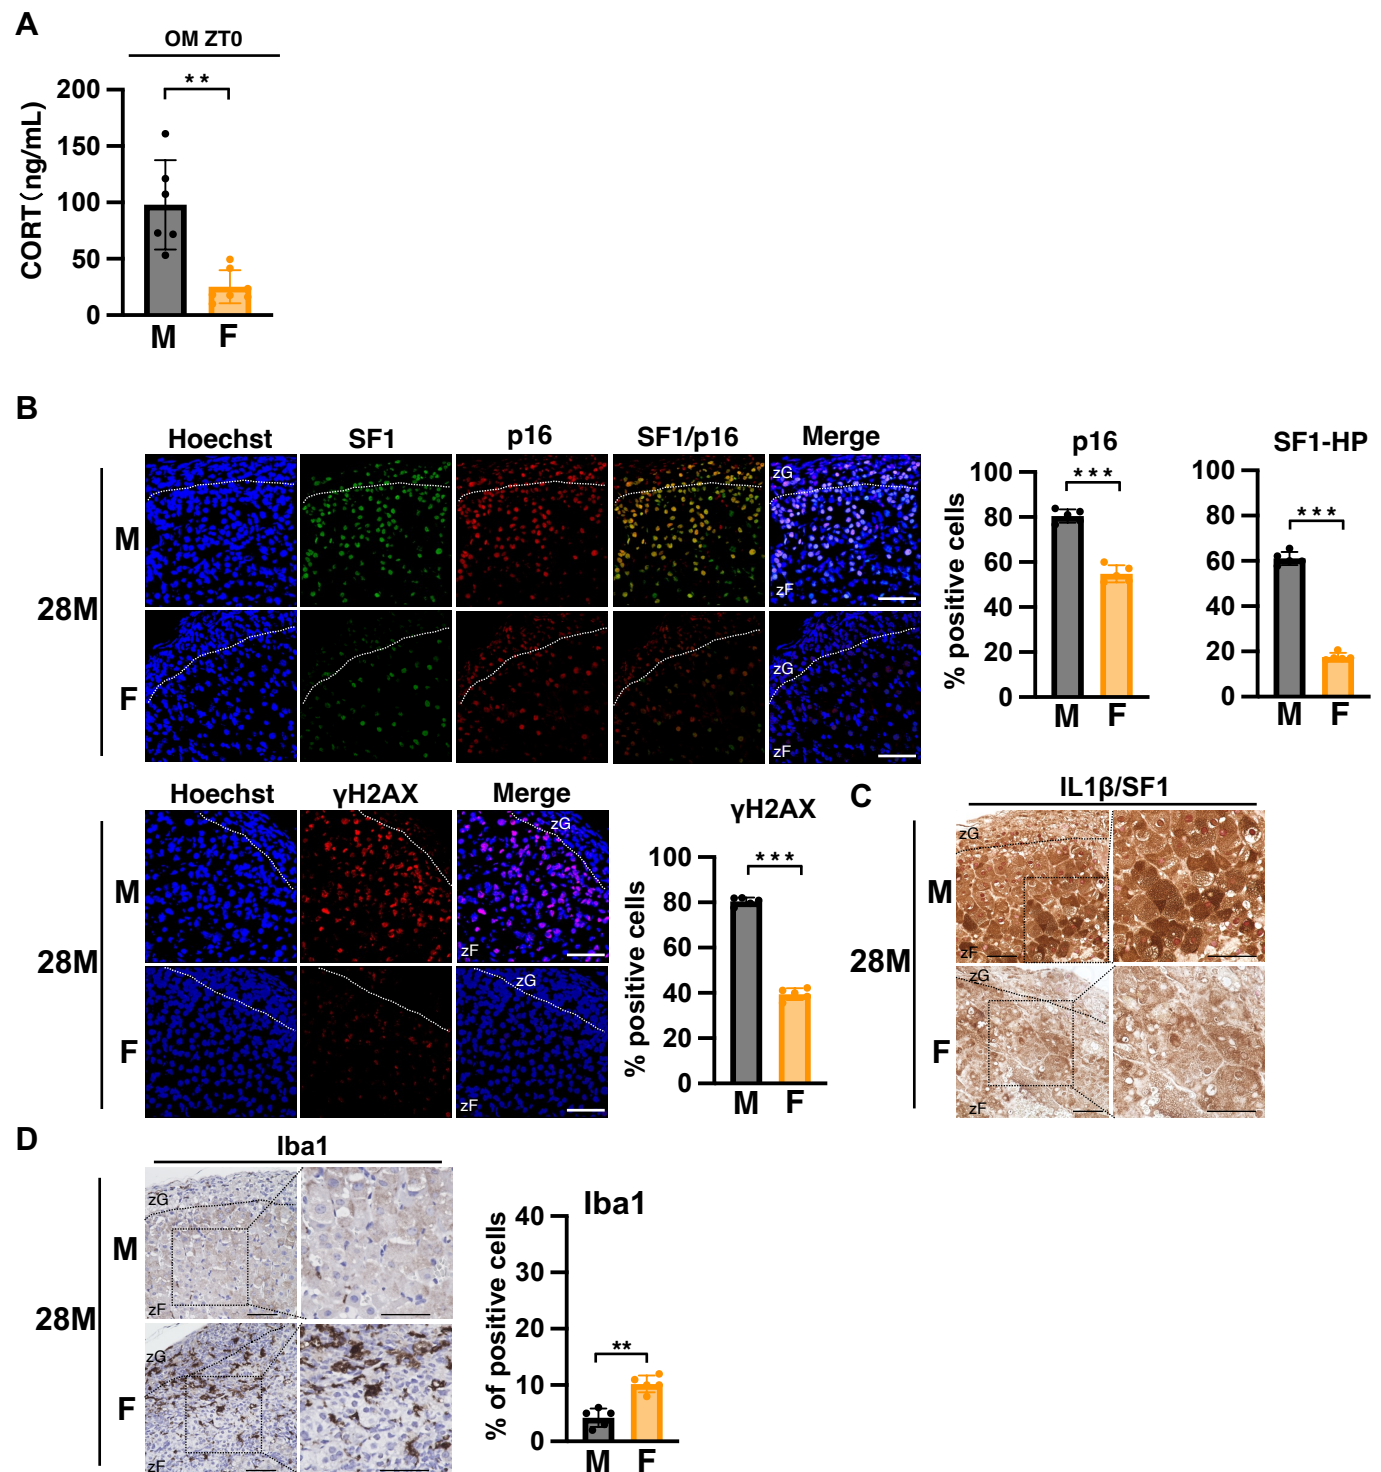

**Figure S7. Comparison of CORT levels at ZT0 and markers of senescence in males and females. A.** Comparison of CORT levels at ZT0 in mouse plasma samples measured in >26-month-old male and female mice. **B–D.** Immunofluorescence analysis of p16, SF1,  $\gamma$ H2AX, IL1 $\beta$  and Iba1 in the adrenal gland. Each section was stained with anti-p16, -SF1, - $\gamma$ H2AX, -IL1 $\beta$  and -Iba1 antibodies and observed using confocal laser scanning microscopy and light microscopy. M: male; F: female; 28M: 28-month-old mice. C: IL1 $\beta$  and SF1 in brown and red, respectively. D: Iba1 and nuclear in brown and blue, respectively. Scale bar (solid line): 50  $\mu$ m. zG: zona glomerulosa; zF: zona fasciculata. Data are presented as means  $\pm$  SDs. Asterisks indicate statistical significance (\*\* $P$  < 0.001, and \*\*\* $P$  < 0.0001; ns: not significant). Quantitative results of immunostaining are summarized in Table S1.

# Supplementary Figure 8

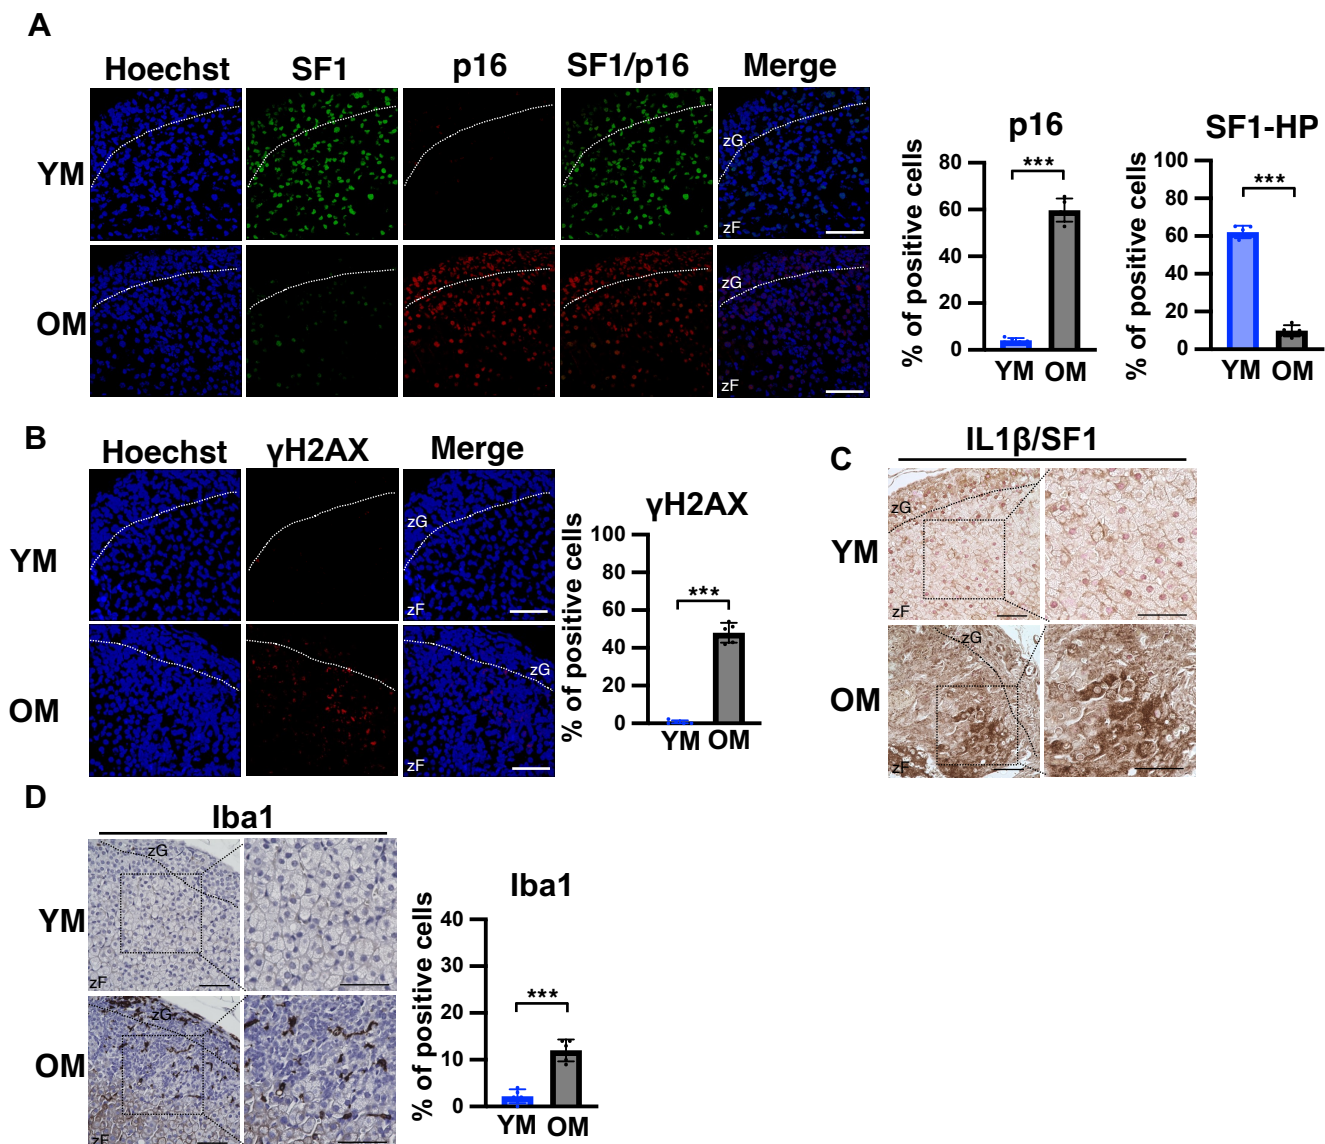

**Figure S8. Adrenal glands in old female mice have increased markers of senescence. A–D.** Immunofluorescence analysis of p16, SF1,  $\gamma$ H2AX, IL1 $\beta$ , Iba1 in the adrenal gland in YM and OM at ZT0, respectively, using confocal laser scanning microscopy and light microscopy. C; IL1 $\beta$  (brown), SF1(red). D; Iba1(brown), nuclear (blue). Scale bar (solid line) = 50  $\mu$ m. zG: zona glomerulosa, zF: zona fasciculata. Percentage of positive cells was quantified in YM and OM at ZT0 in zF. Data are shown as mean  $\pm$  SD. Asterisks indicate statistical significance (\*\*\* $P$  < 0.0001, ns; not significant). The quantitative results of immunostaining are summarized in Table S1.



# Supplementary Figure 9

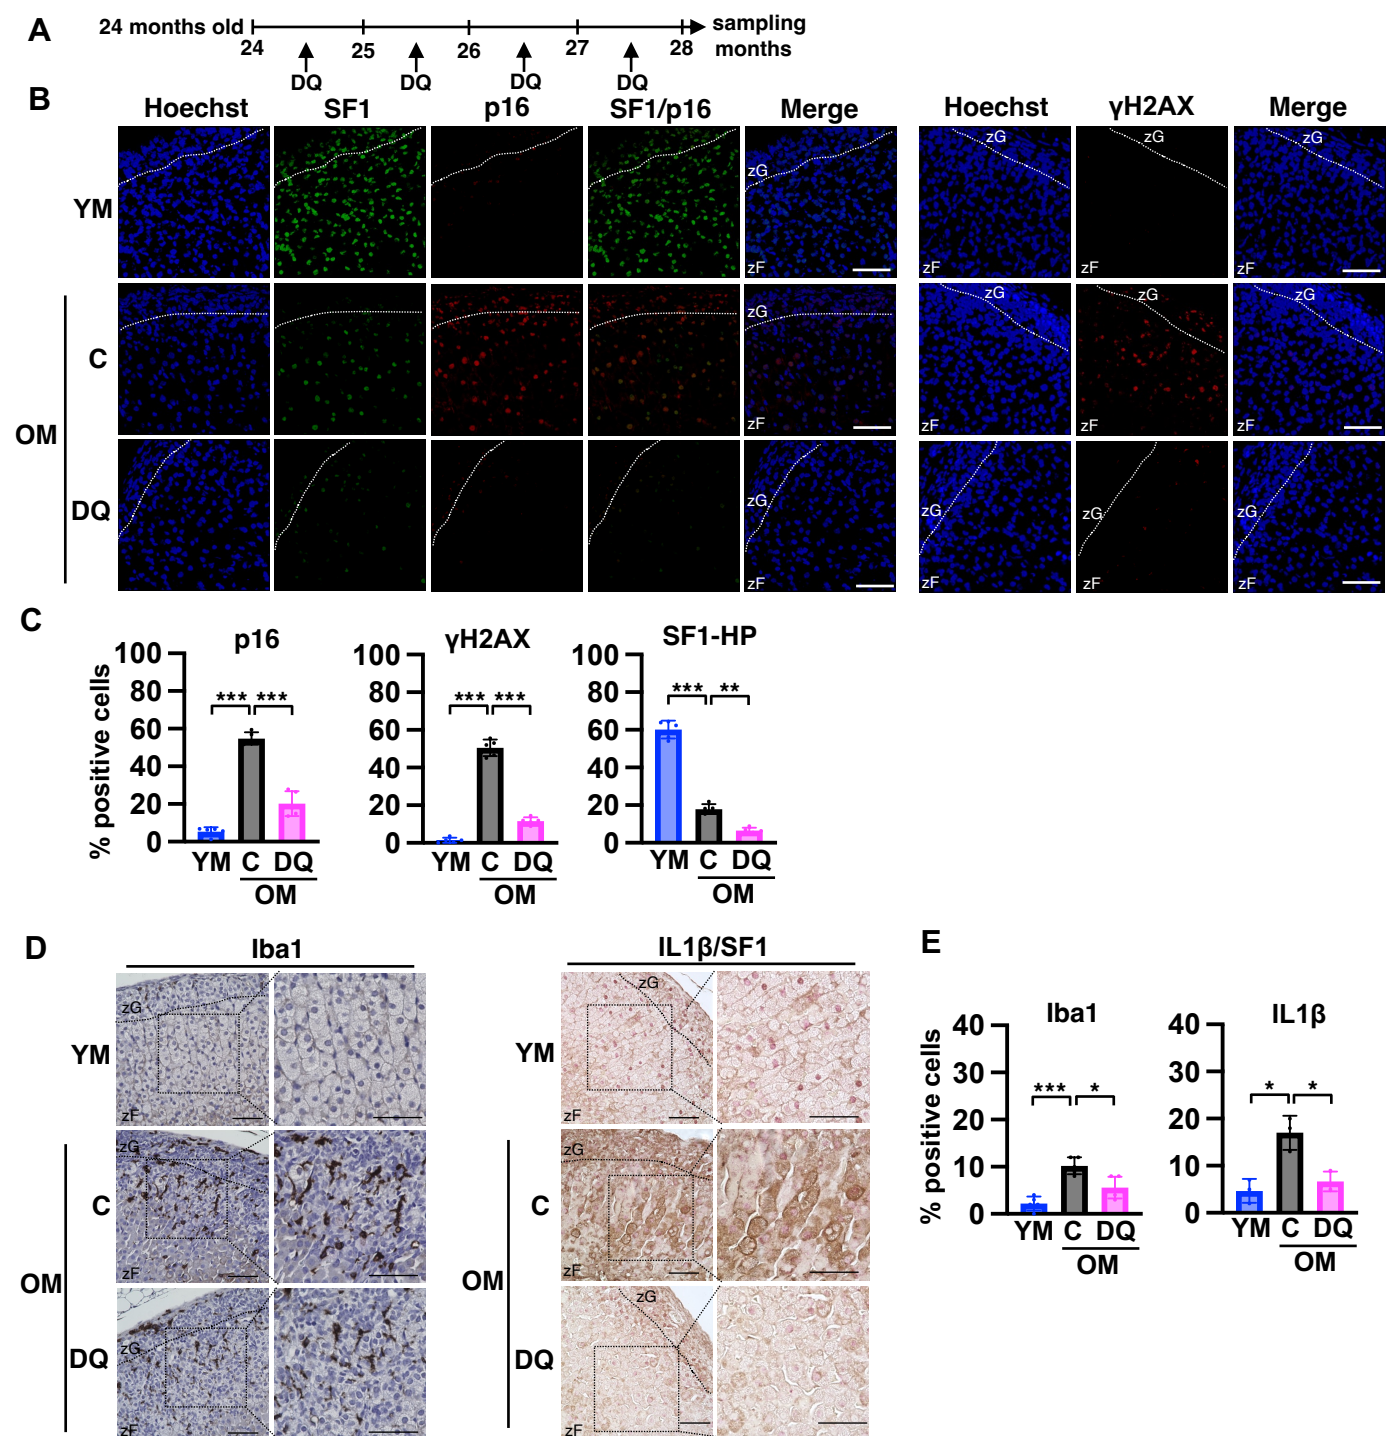

**Figure S9. Senescence markers in old female mice are recovered by senolytic drugs.** **A.** Schedule of DQ administration experiments. **B and D.** Immunofluorescence analysis of p16,  $\gamma$ H2AX, SF1, Iba1 and IL1 $\beta$  in the adrenal gland of DQ-treated mice. Each section was stained with anti-p16, - $\gamma$ H2AX, -SF1, -Iba1 and -IL1 $\beta$  antibodies and observed using confocal laser scanning microscopy and light microscopy. Scale bar (solid line) = 50  $\mu$ m. zG: zona glomerulosa, zF: zona fasciculata. (C: control, DQ: senolysis). **C and E.** The number of p16-,  $\gamma$ H2AX, SF1, Iba1 and IL1 $\beta$ -positive cells in zF was quantified. **D;** Iba1 and IL1 $\beta$  (brown), nuclear (blue) and SF1 (red). SF1-HP; SF1-positive cells. (\*\* $P$  < 0.001, \*\*\* $P$  < 0.0001, ns; not significant). The quantitative results of immunostaining are summarized in Table S1.

# Supplementary Figure 10

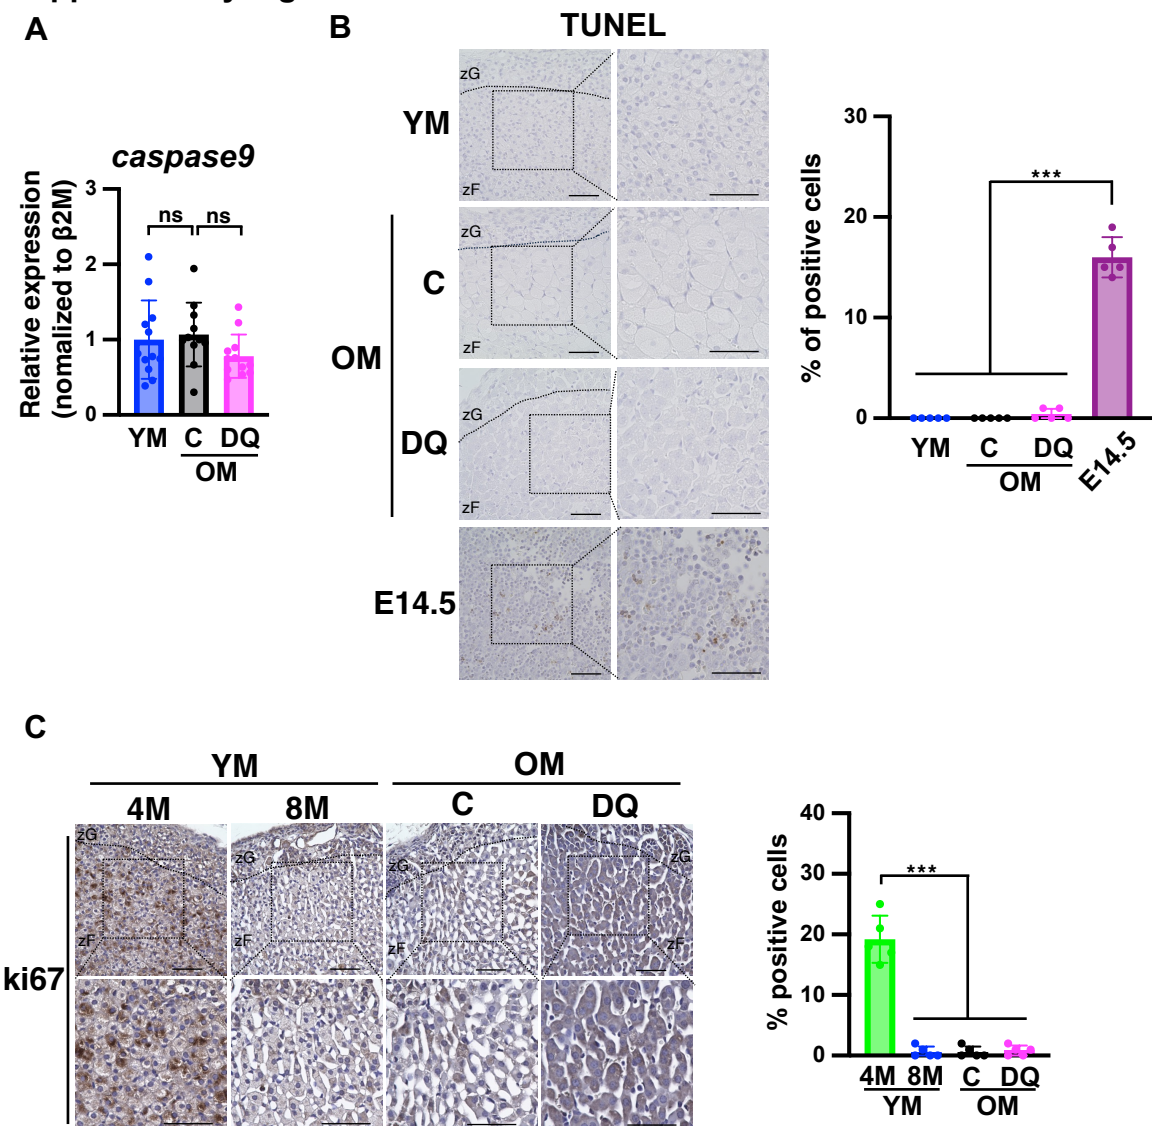

**Figure S10.** **A.** Analysis of mRNA expression of *caspase9* in YM- and OM-DQ-treated mice. All data are presented as relative values and normalized to  $\beta$ -2 microglobulin. **B and C.** Immunofluorescence analysis of TUNEL and ki67 staining in the adrenal gland of DQ-treated mice. Each section was observed using a light microscope. TUNEL (B) and ki67 (C); brown, nuclear; blue. Scale bar (solid line) = 50  $\mu$ m. zG: zona glomerulosa, zF: zona fasciculata. (YM: young mice, C: control, DQ: senolysis, E14.5: embryonic 14.5-day-old mice, 4M: 4-month-old mice, 8M: 8-month-old mice). Percentage of positive cells for TUNEL and ki67 staining. Data are shown as the mean  $\pm$  SD. Asterisks indicate statistical significance (\*\*\*)  $P < 0.0001$ , ns; not significant). The quantitative results of immunostaining are summarized in Table S1.

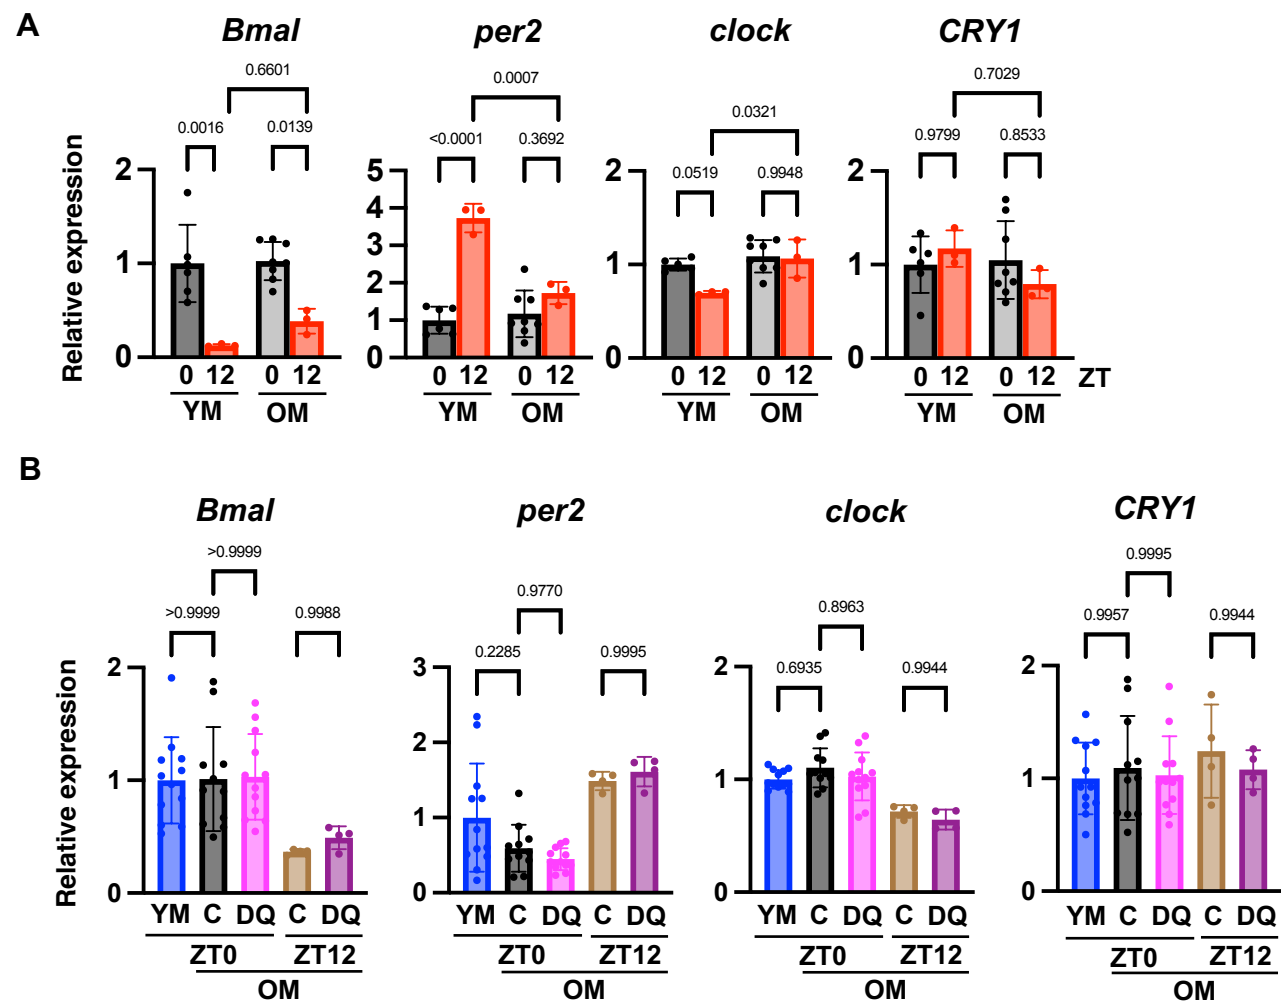

**Figure S11. A and B.** Analysis of mRNA expression of clock genes in YM and OM at ZT0 and ZT12 and YM- and DQ-treated mice. All data are presented as relative values and normalized to TBP. Data are shown as the mean  $\pm$  SD.
